# Supplementary material for: Bacteriocin Production by Escherichia coli during Biofilm Development
Source: MDPI journal article supplement (doi:10.3390/foods11172652), 2022-09-01
Supplement: s1 [file s1]

**Table S1.** Bacterial strains used in this study

| Strain                                      | Serotype                | Source                                                        | Verotoxin production        |
|---------------------------------------------|-------------------------|---------------------------------------------------------------|-----------------------------|
| <i>E. coli</i> CECT 4782                    | O157:H7                 | Human stool from the outbreak of hemorrhagic colitis          | stx1, stx2                  |
| <i>E. coli</i> CECT 4783                    | O157:H7                 | Raw hamburger meat implicated in hemorrhagic colitis outbreak | stx1, stx2                  |
| <i>E. coli</i> CECT 4267                    | O157:H7                 | Human stool from the outbreak of hemorrhagic colitis          | stx1, stx2                  |
| <i>E. coli</i> CECT 5947                    | O157:H7                 |                                                               | Gene stx2 has been replaced |
| <i>E. coli</i> NCTC 12900                   | O157:H7                 |                                                               | NT                          |
| <i>E. coli</i> CECT 352                     | O127a:K63(B8):H-        |                                                               | EPEC                        |
| <i>E. coli</i> CECT 504                     | O141:K85(B):H4          | Swine edema                                                   | ND                          |
| <i>E. coli</i> CECT 515T                    | O1:K1(L1):H7            | Human urine -cystitis                                         | ND                          |
| <i>E. coli</i> CECT 533                     | O103:K:-H-              |                                                               | ND                          |
| <i>E. coli</i> CECT 727                     | O111:K58(B4):H-         | Infantile gastroenteritis                                     | EPEC                        |
| <i>E. coli</i> CECT 730                     | O55:K59(B5):H-          |                                                               | ND                          |
| <i>E. coli</i> CECT 736                     | O28a,28c:K73(B18):H-    | Faeces                                                        | ND                          |
| <i>E. coli</i> CECT 740                     | O125a,125b:K70(B15):H19 | Human gastroenteritis                                         | ND                          |
| <i>E. coli</i> CECT 744                     | O158:K:-h23             | Faeces of an infant with diarrhea                             | ND                          |
| <i>E. coli</i> CECT 832                     | O111:K58(B4):H-         | Infantile gastroenteritis                                     | ND                          |
| <i>E. coli</i> CECT 4537                    | O10:K5(L5):H4           | Human peritonitis                                             | ND                          |
| <i>E. coli</i> CECT 4555                    | O97:K:-H-               |                                                               | ND                          |
| <i>E. coli</i> CECT 434                     | O6:KN                   | Human gastroenteritis                                         | ND                          |
| <i>E. coli</i> N5*                          | ND                      | Bovine faeces                                                 | ND                          |
| <i>E. coli</i> ATCC 29425 (K12)             | OR:H48:K-               |                                                               | ND                          |
| <i>E. coli</i> K12 $\Delta$ impA            | -                       | Laboratory collection                                         | -                           |
| <i>E. coli</i> ER1100A $\Delta$ entF        | -                       | Laboratory collection                                         | -                           |
| <i>Listeria monocytogenes</i> CECT 5873     | -                       |                                                               | -                           |
| <i>Salmonella enterica</i> SGSC 2476        | -                       |                                                               | -                           |
| <i>Shigella dysenteriae</i> ATCC 11335      | -                       |                                                               | -                           |
| <i>Staphylococcus aureus</i> CECT 86        | -                       |                                                               | -                           |
| <i>Staphylococcus epidermidis</i> CECT 4184 | -                       |                                                               | -                           |

NT – non-toxigenic *E. coli*; EPEC – enteropathogenic *E. coli* (epidemiologically implicated as pathogens, but virulence mechanism is not related to the excretion of enterotoxins); ND – Not determined; \* - Isolates; SGSC – *Salmonella* Genetic Stock Centre; ATCC – American Type Culture Collection; NCTC - National Collection of Type Cultures; CECT - Spanish Type Culture Collection.

**Table S2.** Primers used in this study

| Target colicin gene |    | Primers sequence (5' to 3') | Tm (°C) | Amplicon size (bp) |
|---------------------|----|-----------------------------|---------|--------------------|
| For PCR studies     |    |                             |         |                    |
| Ia; Ib              | Fw | GCAGACACGGAATGACAGGGC       | 68      | 406                |
|                     | Rv | GCCGTAACCTTATCCCATTTCAGC    | 66      |                    |
| E1-E3; E6; E8-E9    | Fw | CCTTATGATGATAAGGGGCAGG      | 66      | 576                |
|                     | Rv | CCAGCTCAGATTGTGCAGCAGC      | 70      |                    |
| E7                  | Fw | CCGAGAACCAATGGCTGCTGG       | 68      | 476                |
|                     | Rv | CCTGGGTTCTAGTCTTGGGCG       | 68      |                    |
| 5; 10               | Fw | CCAGAGTTGCAGGRGAGC          | 59      | 658                |
|                     | Rv | CATTAATGCCACAATTTTGGC       | 60      |                    |
| B                   | Fw | CCAAAGGCTATAAGGGCCGAGC      | 70      | 709                |
|                     | Rv | CCCGAAATCCAGGAAGATGGCG      | 70      |                    |
| M                   | Fw | GGTACTTCTGTAACGCCG          | 58      | 495                |
|                     | Rv | GCCTTGTGAGCGACTCTCC         | 62      |                    |
| For qPCR studies    |    |                             |         |                    |
| B                   | Fw | CCACACTTAATACCAGGTCCGG      | 57      | 124                |
|                     | Rv | CCGATGACAGTGCCAGTAGTGG      | 59      |                    |
| M                   | Fw | CCAAACATGTGTCTTCAGGC        | 52      | 140                |
|                     | Rv | GGGTGAAGAACCAGATTTTCG       | 52      |                    |
| E                   | Fw | GGGCGCGCATAGCACAAGTGG       | 60      | 124                |
|                     | Rv | GCTACCGGAACCACCACCC         | 58      |                    |
| GAPDH               | Fw | GCCTCTTTTTTCGGCGTAAACC      | 54      | 129                |
|                     | Rv | CCCCAAAAATTCTCGCCTACC       | 54      |                    |

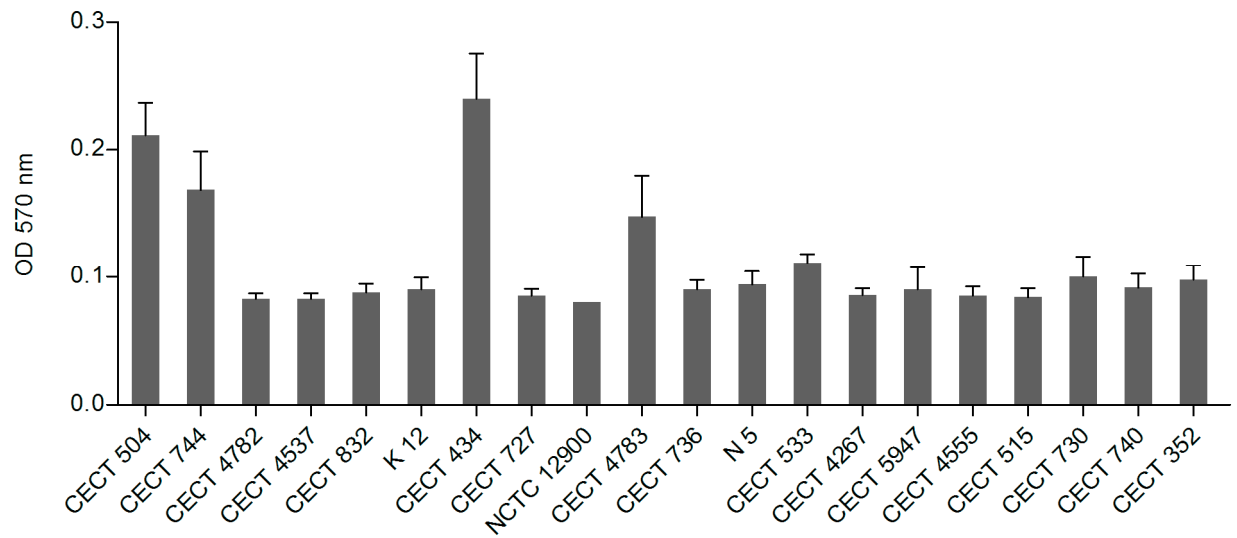

**Figure S1.** Single-species biofilm formation of *E. coli*. Biofilms were grown in 96-well microtiter plates for 24 h in LB and LB supplemented with 0.25 % (w/v) glucose media. The biomass amount was assessed by the crystal violet method as described in the methods section of this manuscript.
